# Supplementary material for: Bornyl cis-4-Hydroxycinnamate Suppresses Cell Metastasis of Melanoma through FAK/PI3K/Akt/mTOR and MAPK Signaling Pathways and Inhibition of the Epithelial-to-Mesenchymal Transition
Source: MDPI journal article supplement (doi:10.3390/ijms19082152), 2018-07-24
Supplement: s1 [file s1]

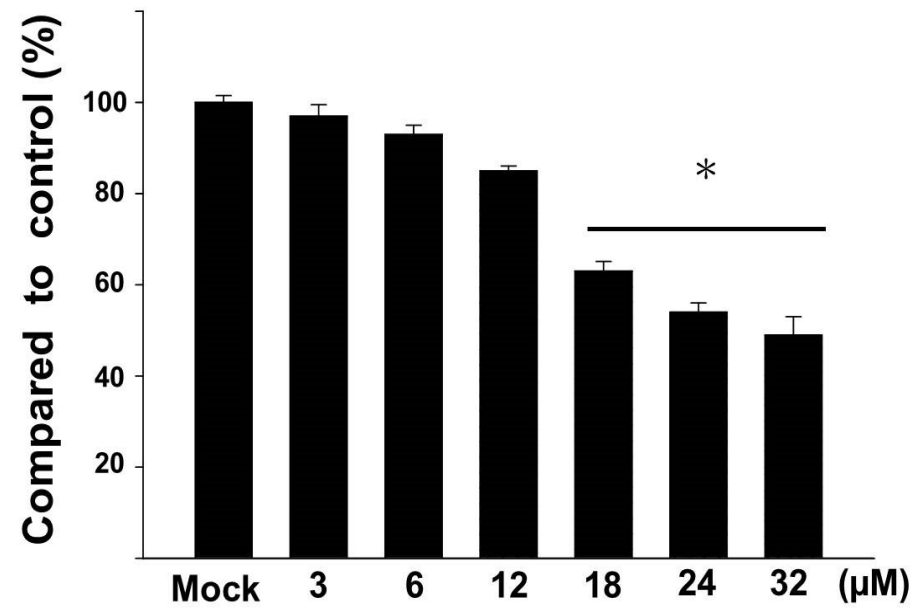

**Figure S1.** We selected the melanoma cells (B16-F10 cells) for the study and also used different concentration of bornyl cis-4-hydroxycinnamate for the MTT assay. The cell viability assay results were similar to A2058 cells and A375 cells.

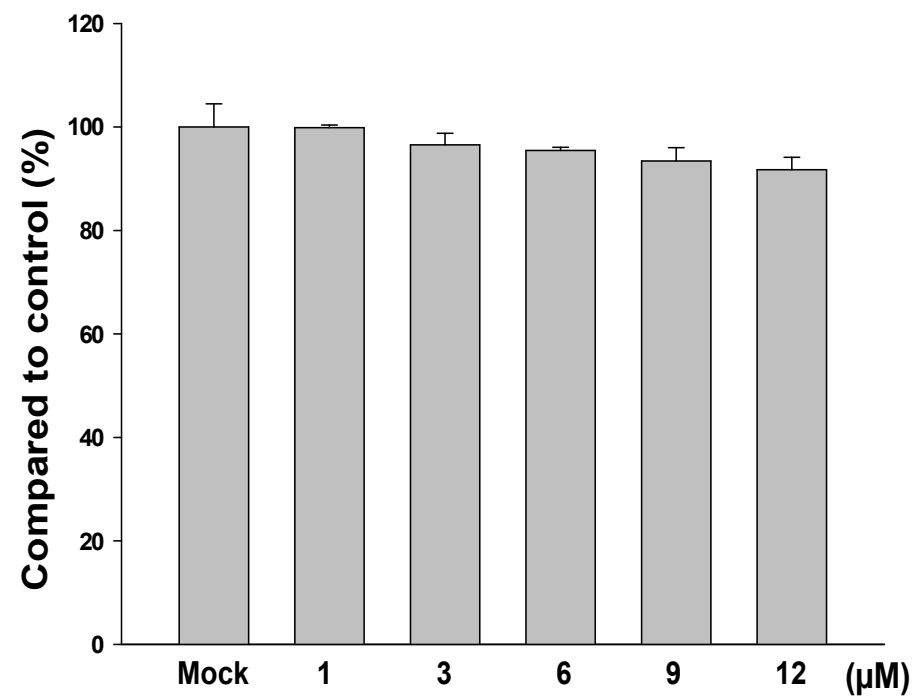

**Figure S2.** We selected the fibroblast cells (WS-1 cells) for cell cytotoxicity analysis. In the results, we found that bornyl cis-4-hydroxycinnamate was not significantly cytotoxic for WS-1 cells.
